# Supplementary material for: Usefulness of real time PCR for the differentiation and quantification of 652 and JP2 Actinobacillus actinomycetemcomitans genotypes in dental plaque and saliva
Source: Springer Nature journal article supplement (doi:10.1186/1471-2334-6-98), 2006-06-13
Supplement: 12879_2006_362_MOESM1_ESM.pdf [file 12879_2006_362_MOESM1_ESM.pdf]

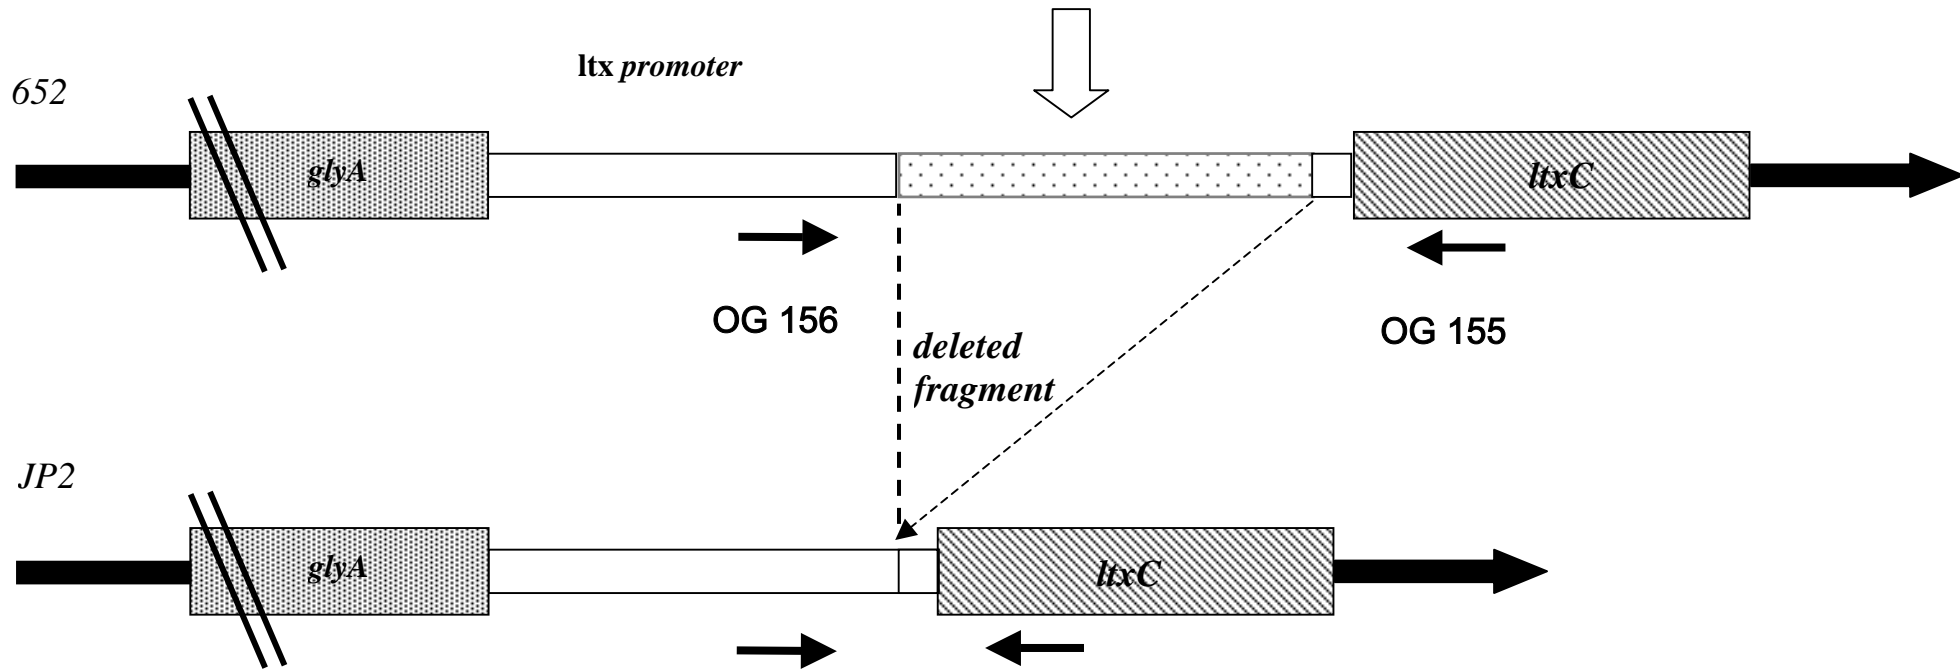

| Name  | Sequence 5'—3'       | GenBank accession. n. | position | 652 genotype                            | JP2 genotype                            |
|-------|----------------------|-----------------------|----------|-----------------------------------------|-----------------------------------------|
| OG155 | CATTCTCGGCGAAAAAACTA | S68133                | 346-365  | PCR fragment/ $T_m \pm 2^\circ\text{C}$ | PCR fragment/ $T_m \pm 2^\circ\text{C}$ |
| OG156 | CCCATAACCAAGCCACATAC | M27399                | 168-149  | 696 bp/82°C                             | 195 bp/76°C                             |
