# Supplementary material for: Usefulness of real time PCR for the differentiation and quantification of 652 and JP2 Actinobacillus actinomycetemcomitans genotypes in dental plaque and saliva
Source: Springer Nature journal article supplement (doi:10.1186/1471-2334-6-98), 2006-06-13

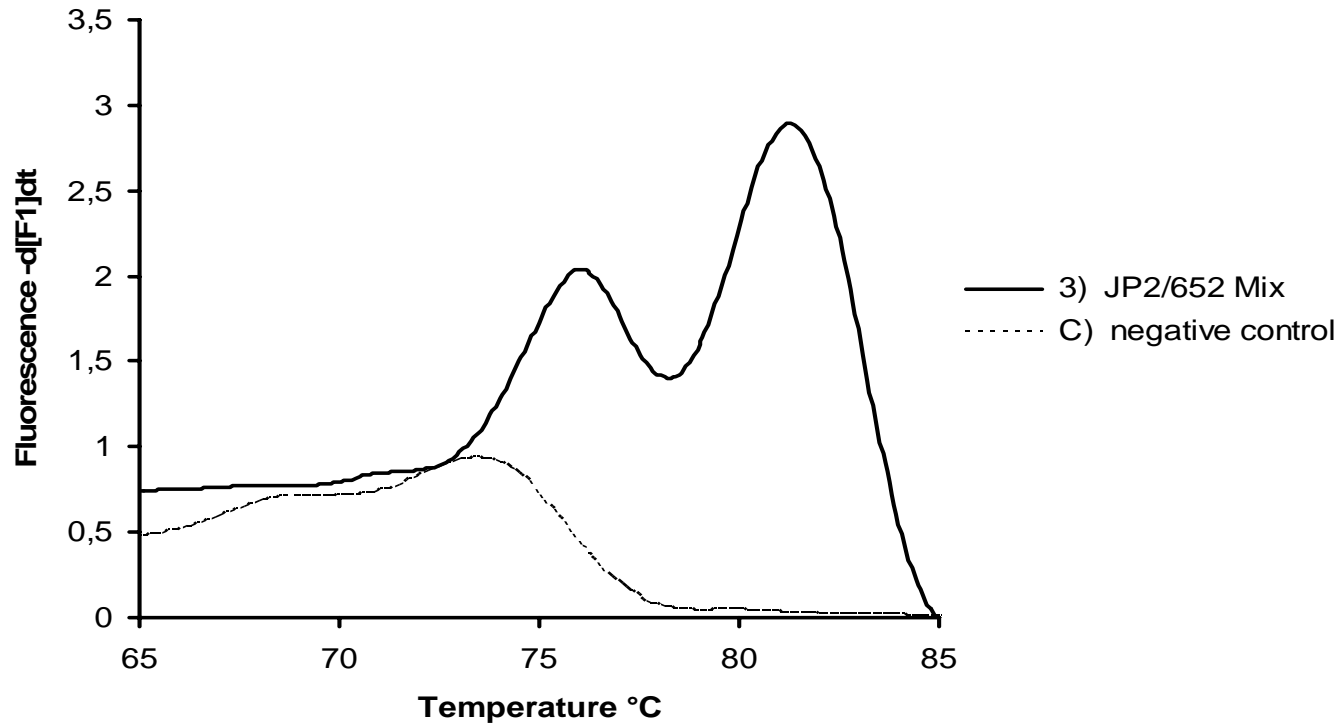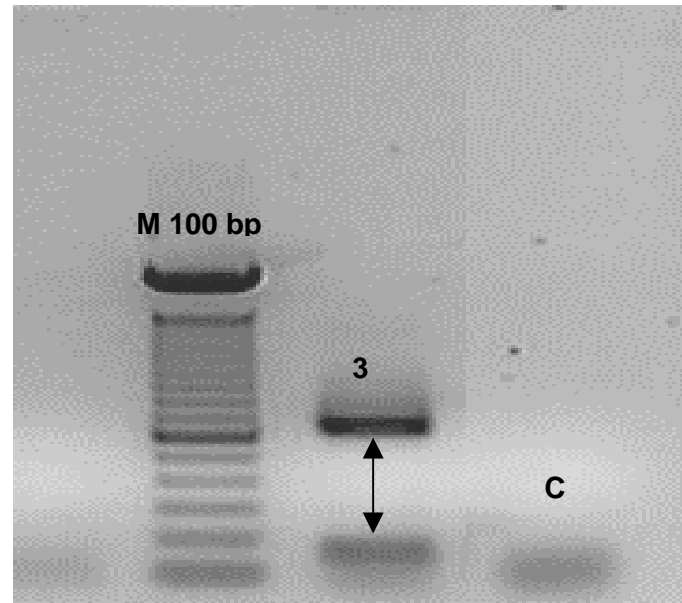

Supplement: 12879_2006_362_MOESM3_ESM.pdf [file 12879_2006_362_MOESM3_ESM.pdf]
